# FOCUS

THE JOURNAL OF LIFELONG LEARNING IN PSYCHIATRY



## *Fundamentals of Life: Disorders of Sleep, Eating and Sex*

*Guest Editors, Richard C. Friedman, M.D.  
Jennifer I. Downey, M.D.*

### IN CLINICAL SYNTHESIS:

**Taking a Sexual History:  
The Adult Psychiatric Patient**

*Jennifer I. Downey, M.D.  
Richard C. Friedman, M.D.*

**Evaluation and Management of Insomnia  
in the Psychiatric Setting**

*Karl Doghramji, M.D.  
Ritu Grewal, M.D.  
Dimitri Markov, M.D.*

**Anorexia Nervosa**

*Vikas Duvvuri, M.D., Ph.D.  
Walter H. Kaye, M.D.*

**AND INFLUENTIAL PUBLICATIONS . . .**
