*Disorders of Sleep, Eating and Sex*

**FOCUS** THE JOURNAL OF LIFELONG LEARNING IN PSYCHIATRY

Fall 2009, Volume VII, Number 4

# FOCUS

THE JOURNAL OF LIFELONG LEARNING IN PSYCHIATRY

## *Fundamentals of Life: Disorders of Sleep, Eating and Sex*

*Guest Editors, Richard C. Friedman, M.D.  
Jennifer I. Downey, M.D.*

### IN CLINICAL SYNTHESIS:

Taking a Sexual History:  
The Adult Psychiatric Patient

*Jennifer I. Downey, M.D.  
Richard C. Friedman, M.D.*

Evaluation and Management of Insomnia  
in the Psychiatric Setting

*Karl Dogbramji, M.D.  
Ritu Grewal, M.D.  
Dimitri Markov, M.D.*

Anorexia Nervosa

*Vikas Duvvuri, M.D., Ph.D.  
Walter H. Kaye, M.D.*

AND INFLUENTIAL PUBLICATIONS . . .
